# Supplementary material for: Impact of Active Video Games on Body Mass Index in Children and Adolescents: Systematic Review and Meta-Analysis Evaluating the Quality of Primary Studies
Source: PubMed Central journal article supplement (PMC6650803; doi:10.3390/ijerph16132424), 2019-07-08
Supplement: ijerph-16-02424-s001.pdf [file ijerph-16-02424-s001.pdf]

# Supplementary Material

S1 Figure. Pre-post intra-group difference in BMI in the group intervened with active video games. Subgroup analysis based on the quantitative assessment of the quality of the primary studies.

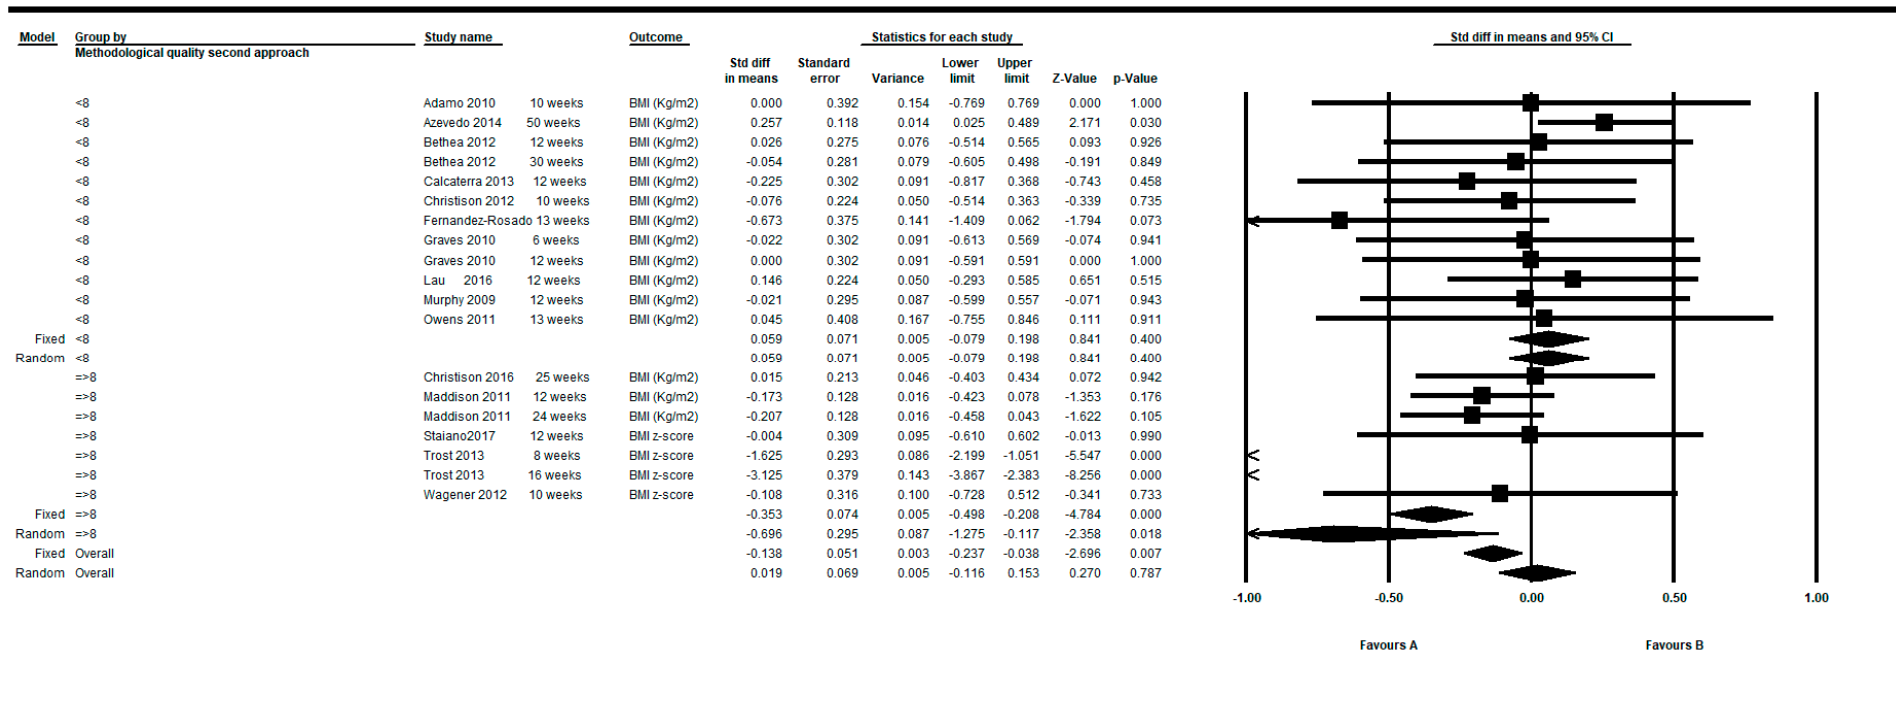

S2 Figure. Pre-post intra-group difference in BMI in the group intervened with active video games. Analysis of subgroups according to their publication date (last 5 years versus ≤2010).

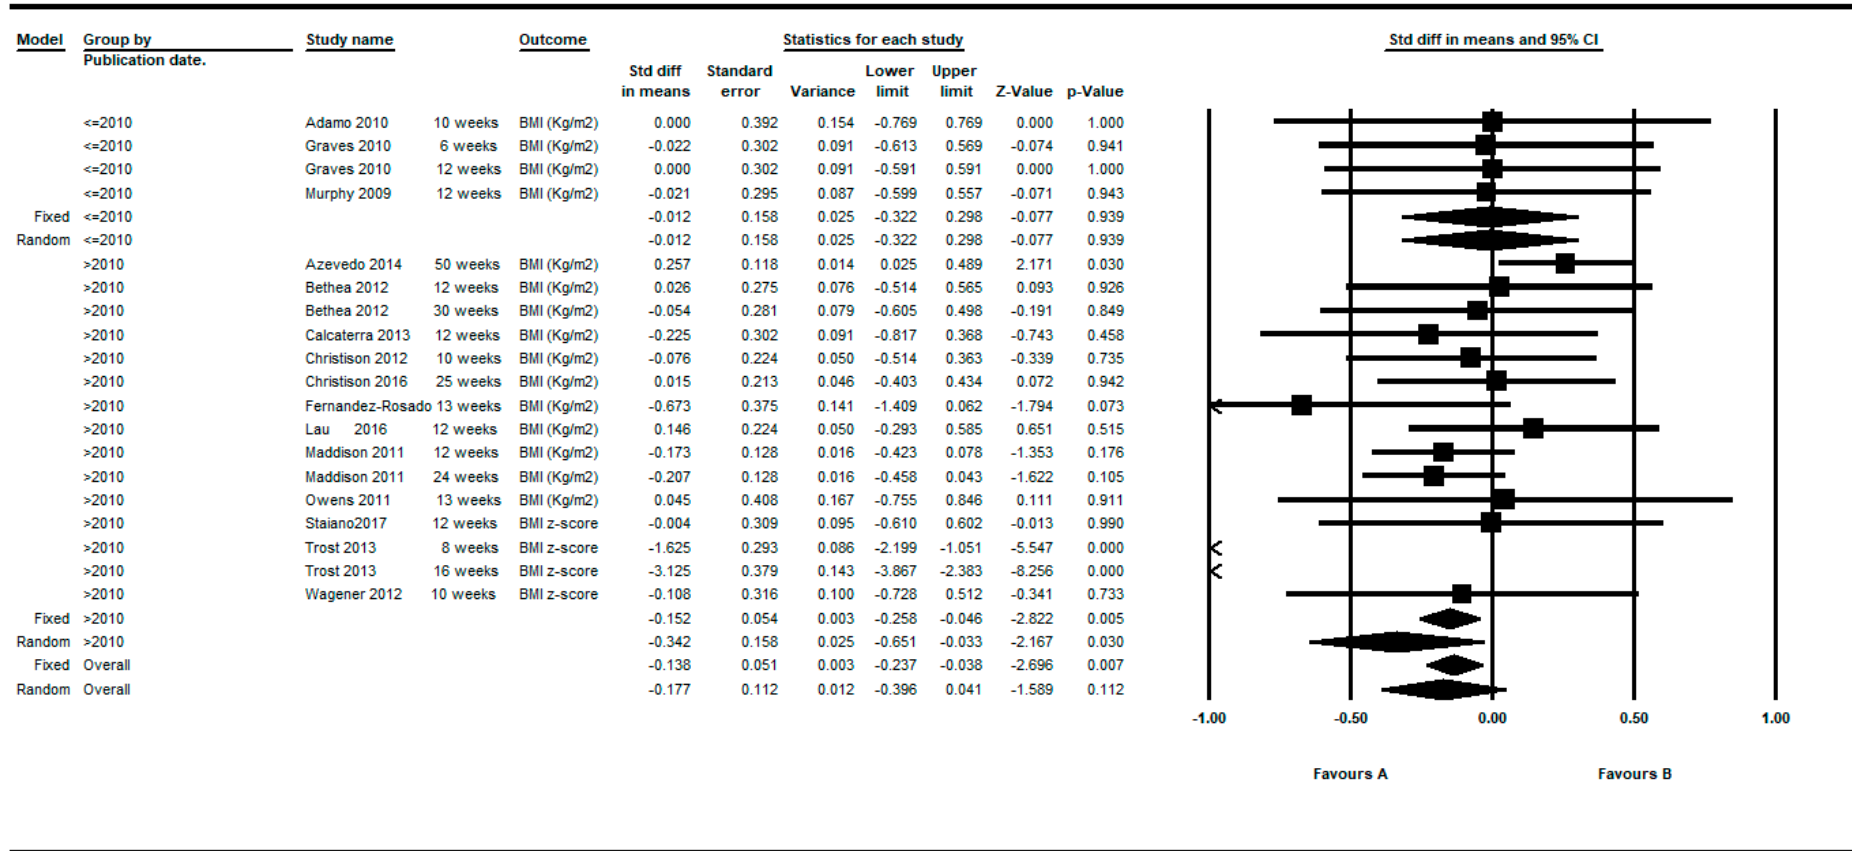

S3 Figure. Pre-post intra-group difference in BMI in the group intervened with active video games. Analysis of subgroups according to their place of study (Europe, USA, Australia & New Zealand).

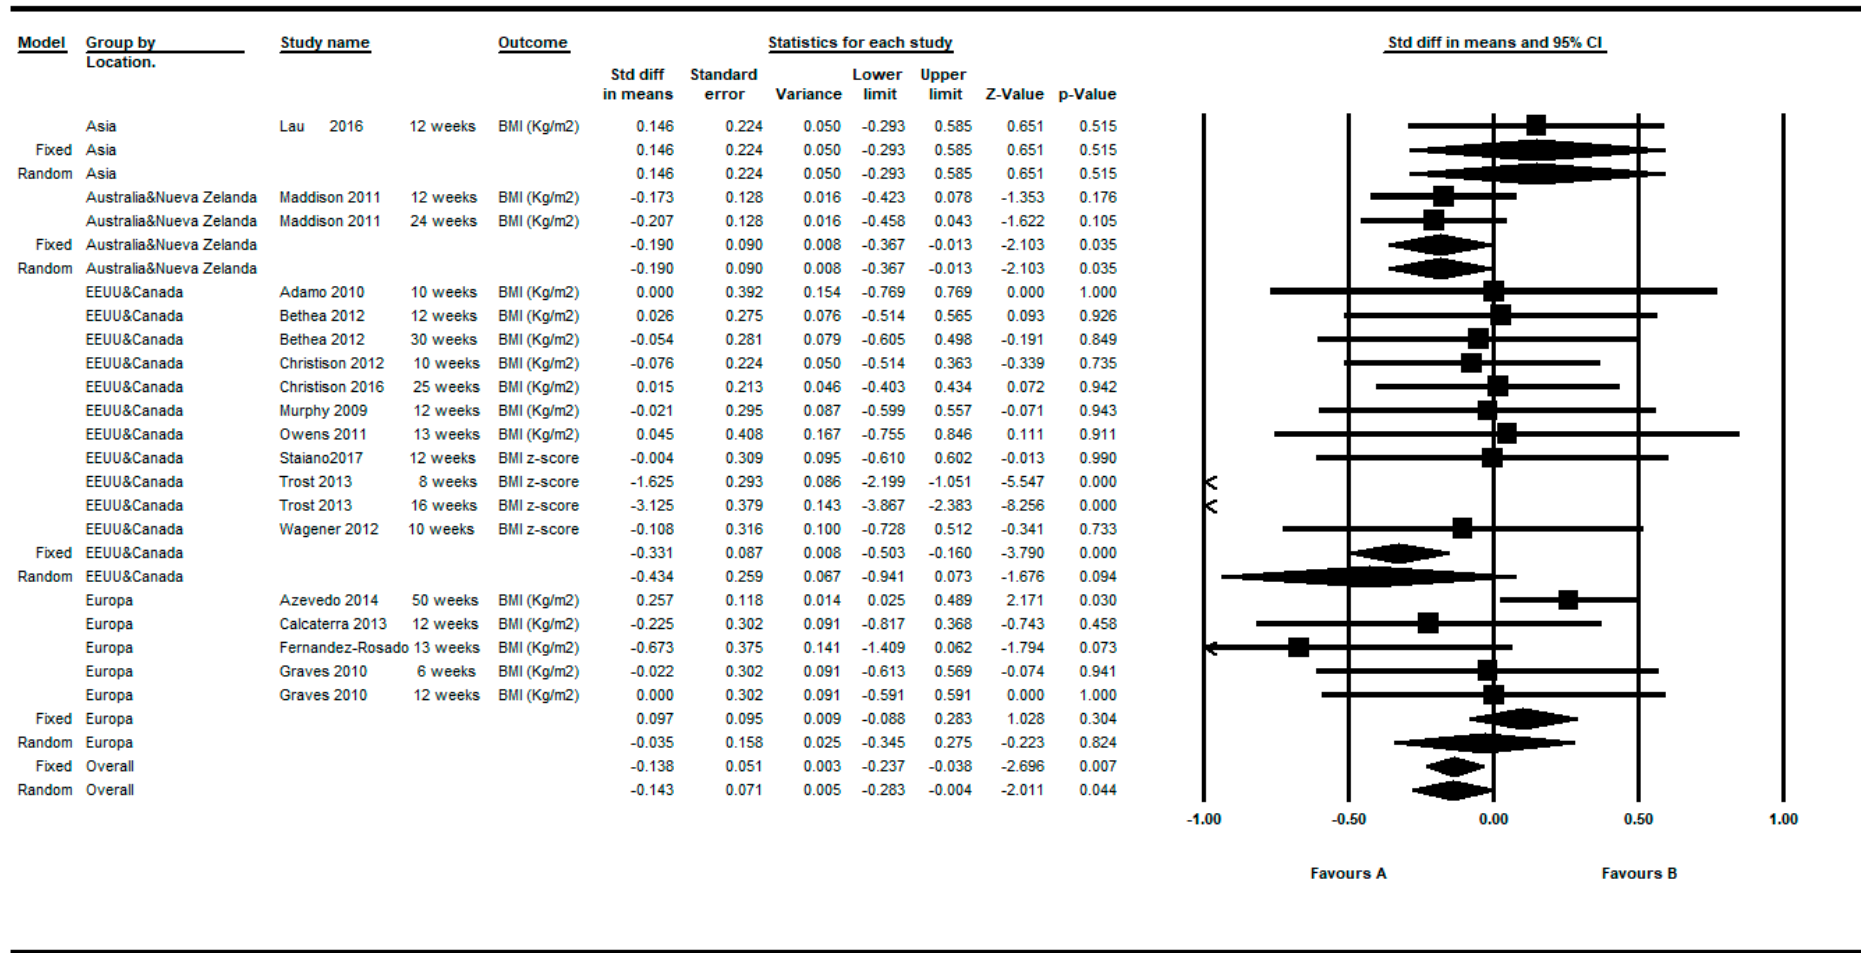

S4 Figure. Pre-post intra-group difference in BMI in the group intervened with active video games. Subgroup analysis based on the design of the controlled studies (randomized vs. non-randomized).

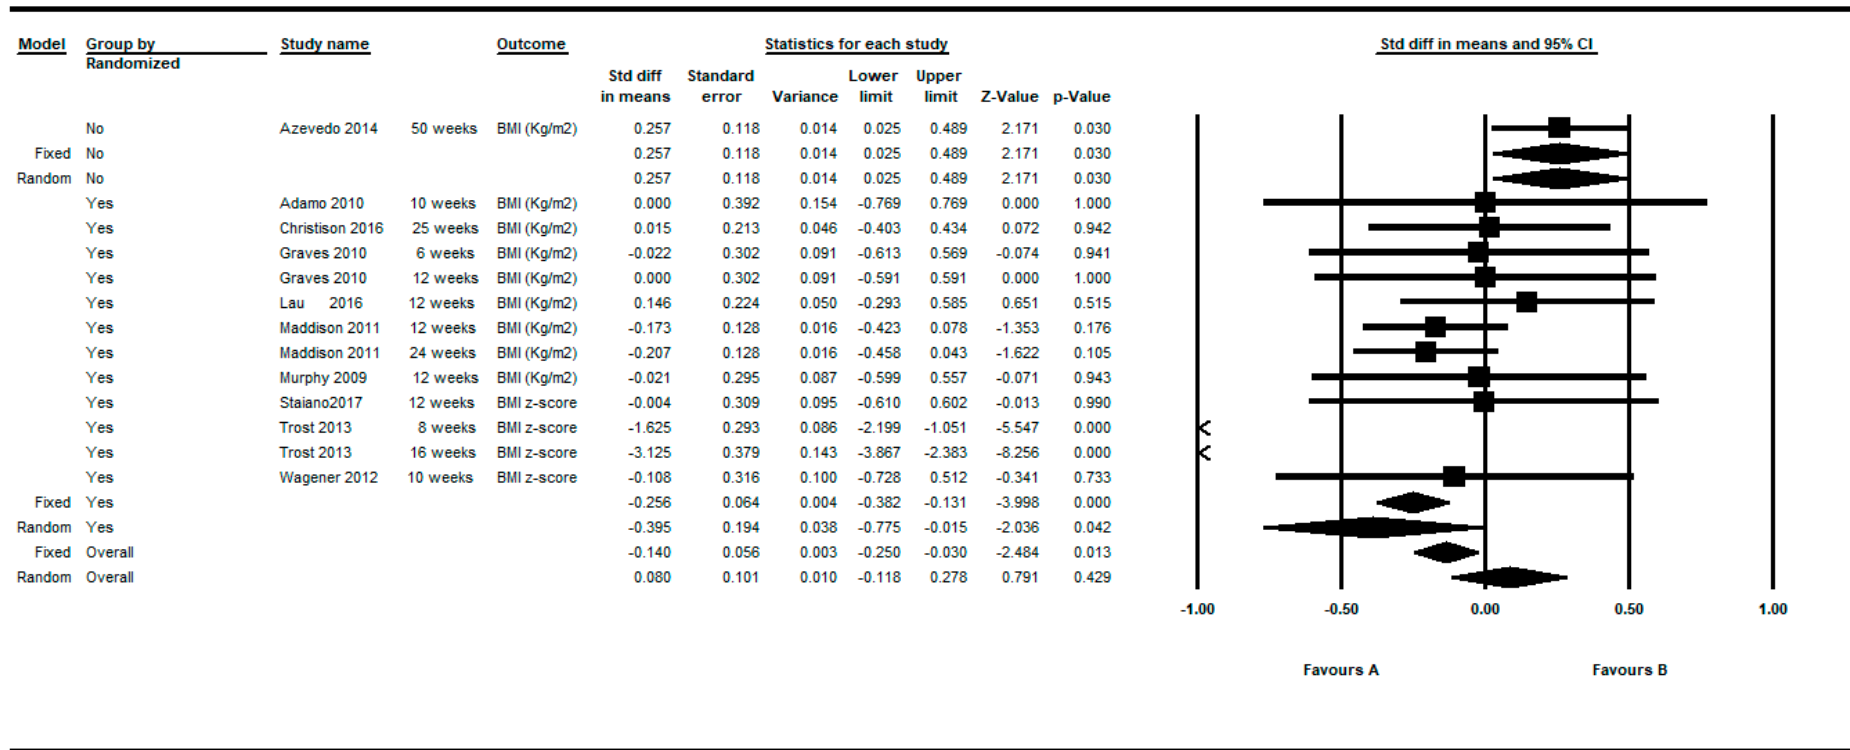

S5 Figure. Pre-post intra-group difference in BMI in the group intervened with active video games. Analysis of subgroups according to the weeks of follow-up: '( <12 weeks) (≥12- <24 weeks) (≥24 weeks)'.

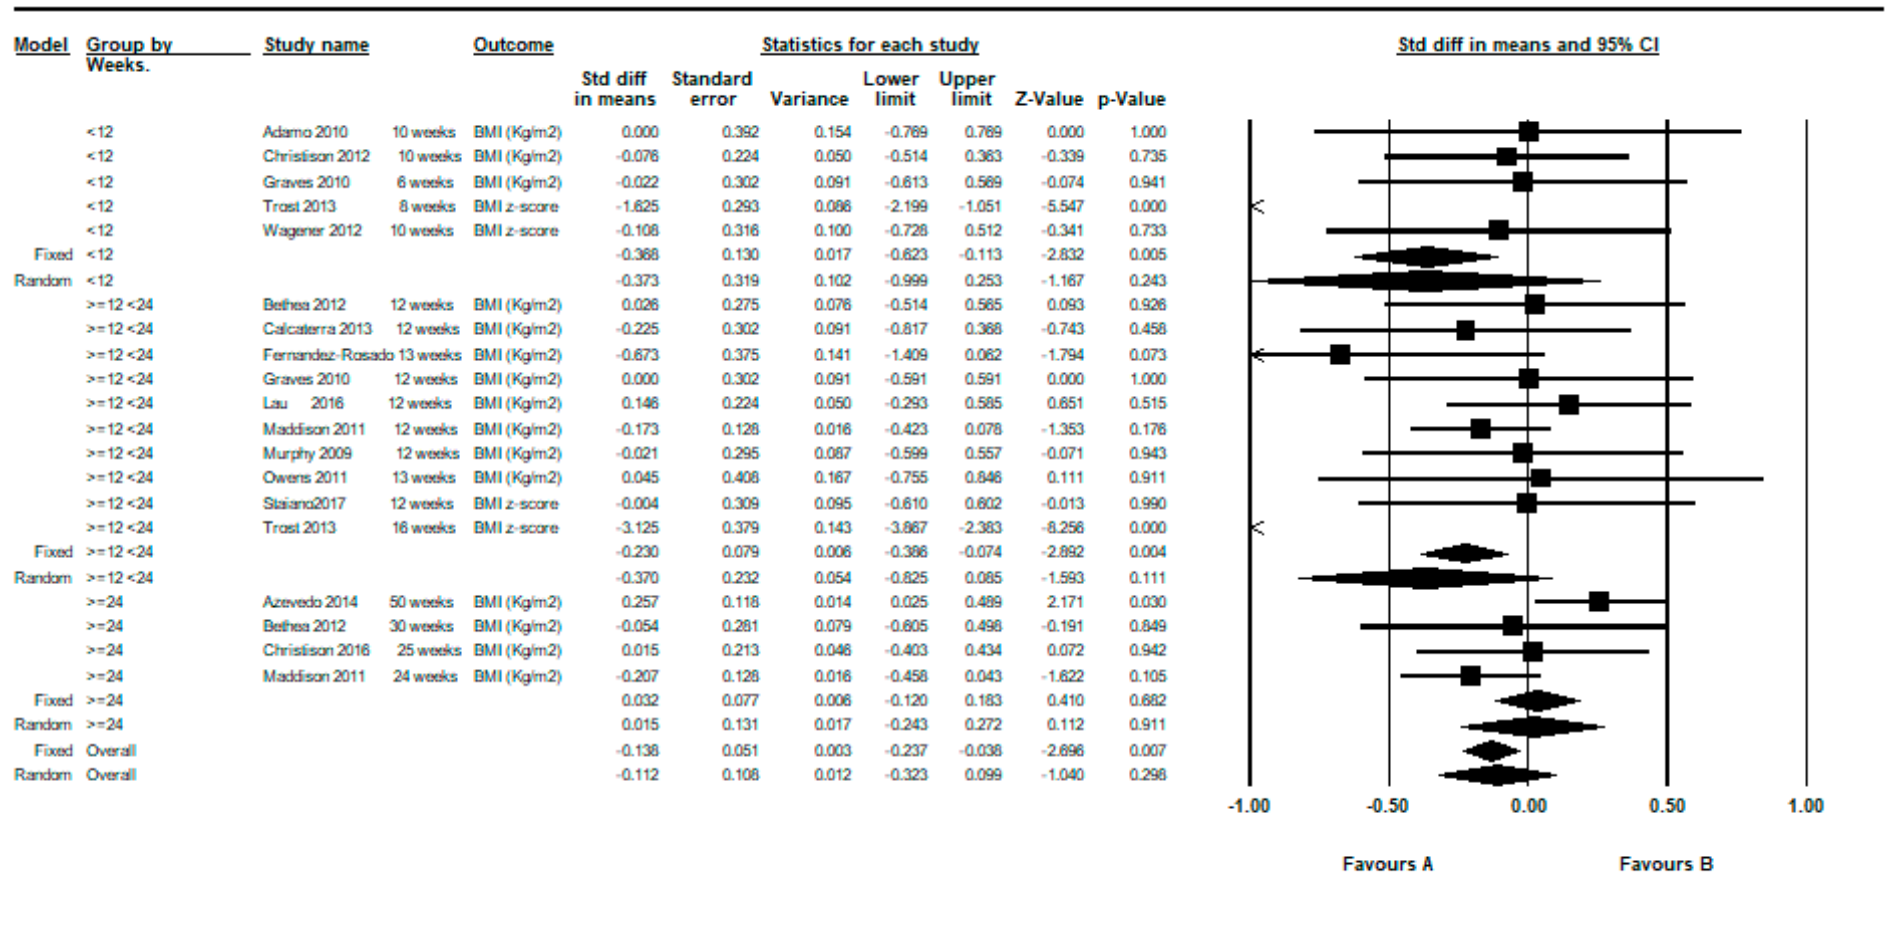

S6 Figure. Pre-post intra-group difference in BMI in the group intervened with active video games. Analysis of subgroups according to the minimum age of children or adolescents (<12 years vs ≥12).

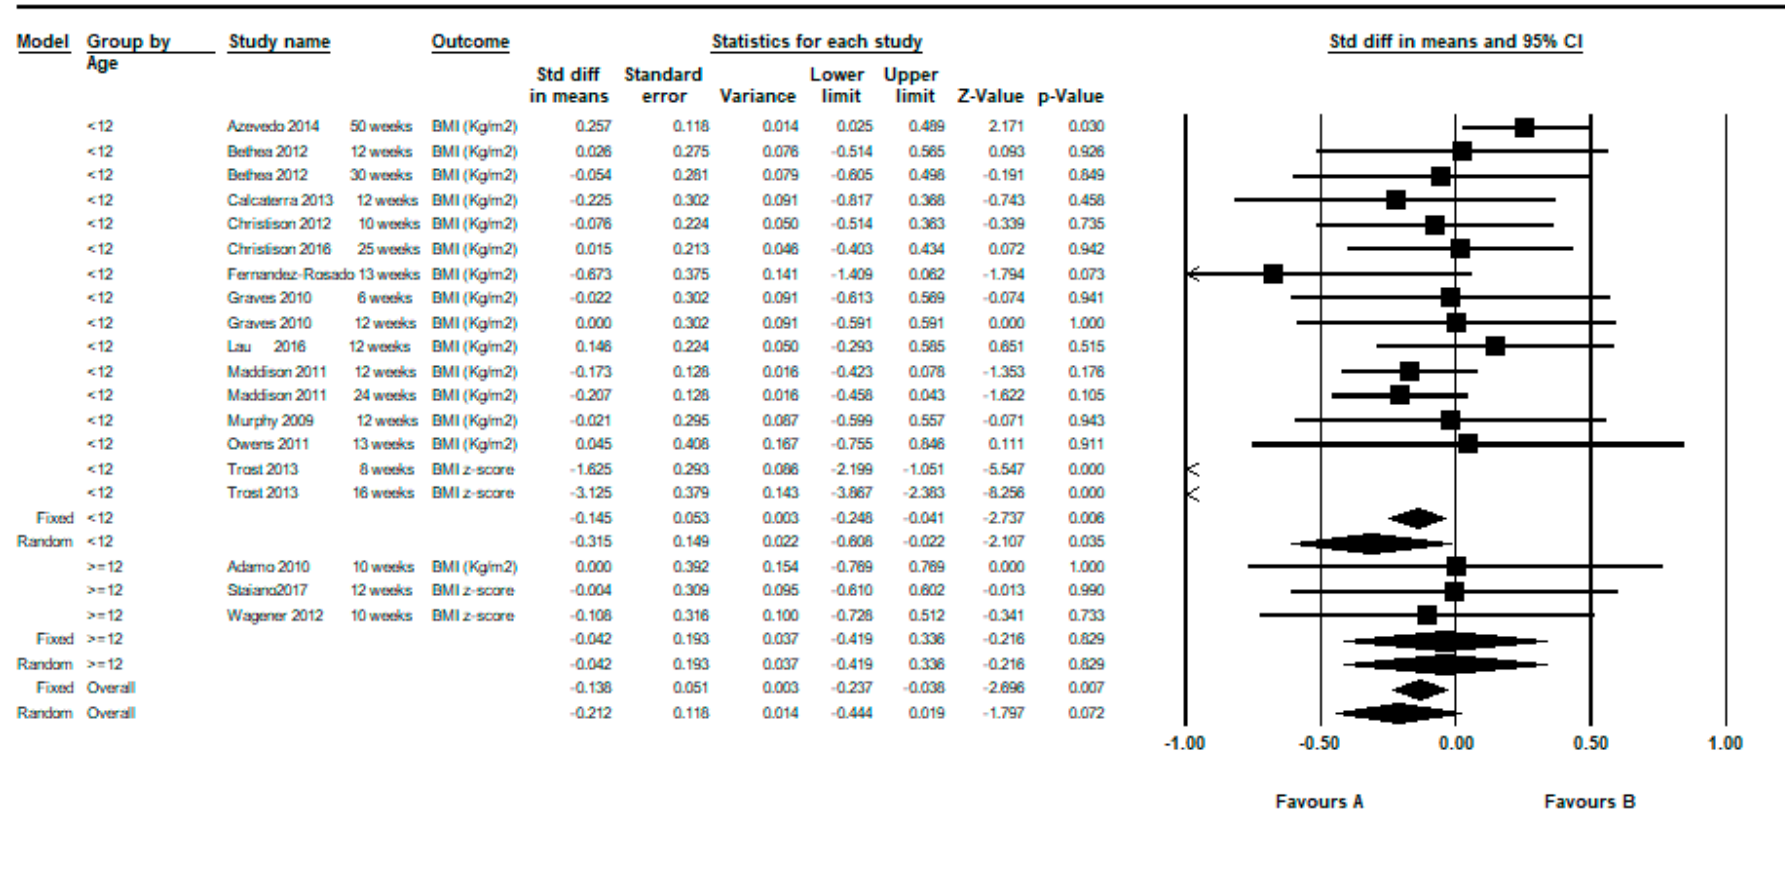

S7 Figure. Pre-post intra-group difference in BMI in the group intervened with active video games. Analysis of subgroups according to gender (male versus female versus 'both sexes or sex not specified').

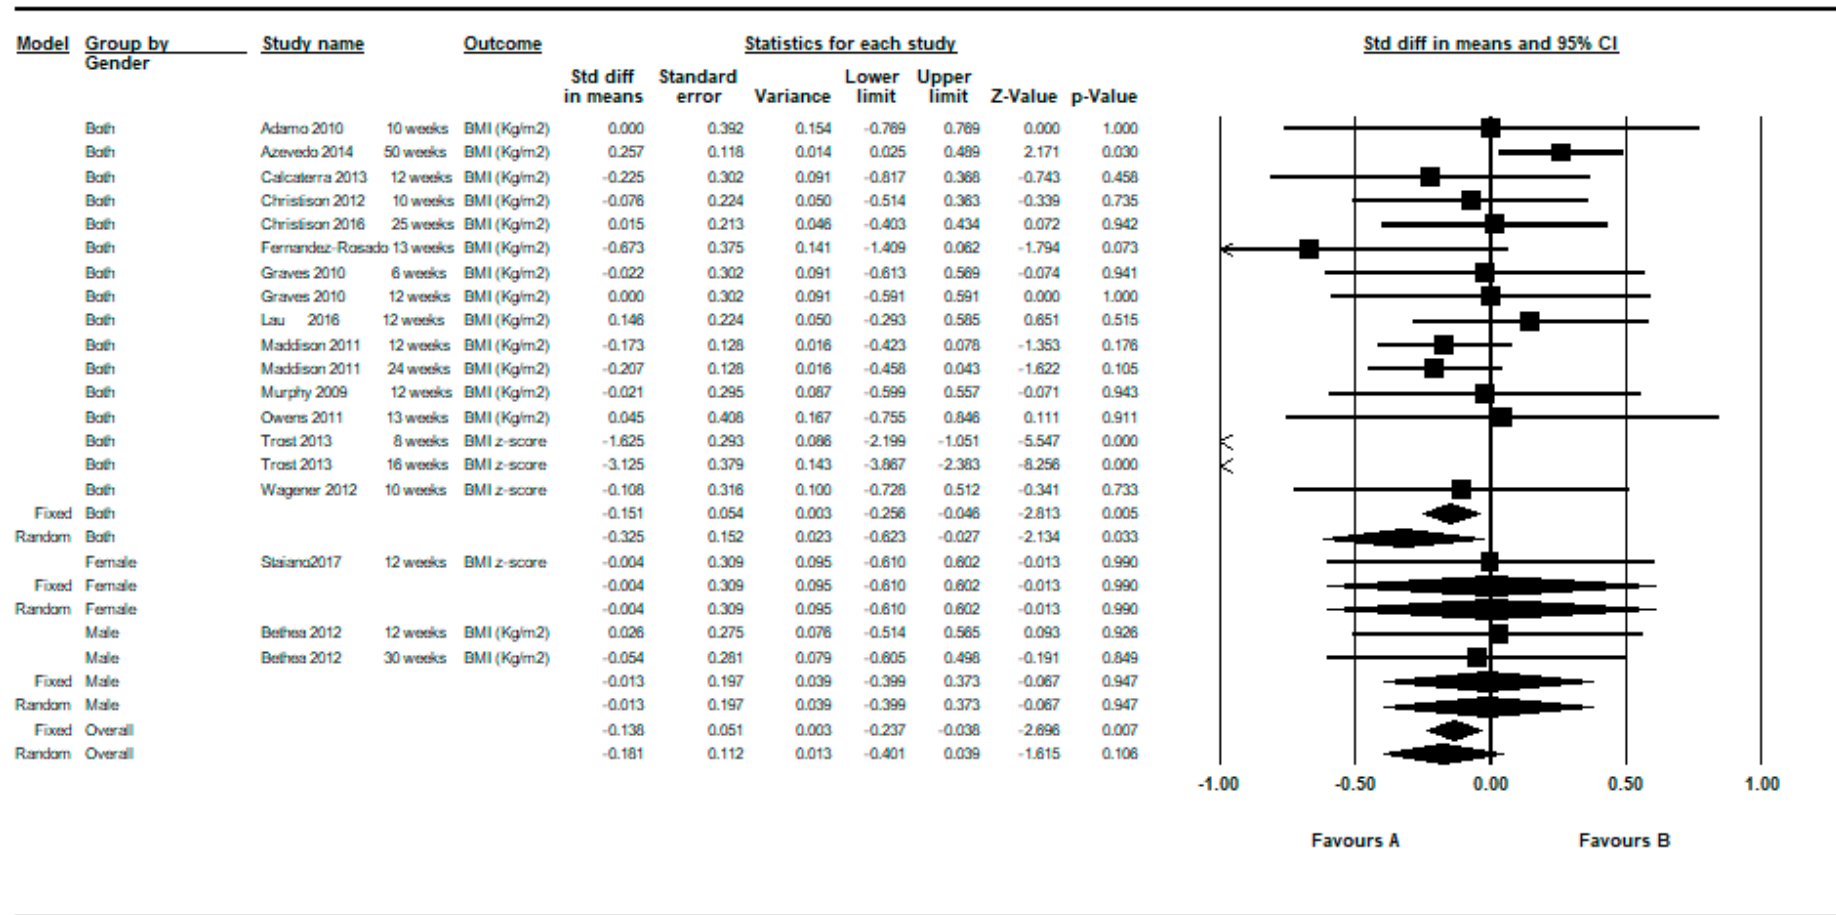

# Author Contributions

CHJ and MS were responsible for the study conception and design, managed data collection and performed analysis. CHJ, RS, MPZ, PPB, and MS were responsible for manuscript preparation. All authors interpreted analyses and made critical revisions to the paper for important intellectual content. All authors read and approved the final version of manuscript.

# Conflict of interest

All authors declare that they have no conflict of interest.

# Funding

The authors received no specific funding for this work.

# Data Availability

Datasets used and/or analysed during the current study available from the corresponding author on reasonable request.
